# Supplementary material
Source: PubMed Central journal article supplement (PMC6515574)
Supplement: jama-321-1916-s001.pdf [file jama-321-1916-s001.pdf]

## Supplementary Online Content

Kinge JM, Modalsli J, Øverland S, et al. Association of household income with life expectancy and cause specific mortality in Norway, 2005-2015. *JAMA*. doi:10.1001/jama.2019.4329

### **eMethods and eResults**

This supplementary material has been provided by the authors to give readers additional information about their work.

1  
2  
3  
4  
5  
6  
7  
8  
9  
10  
11  
12  
13  
14  
15  
16  
17  
18  
19  
20  
21  
22  
23  
24  
25  
26  
27  
28  
29  
30  
31  
32  
33  
34  
35

## Supplementary Online Content

### Household Income, Life Expectancy and Cause Specific Mortality in Norway: 2005-2015

Kinge JM, Modalsli JH, Øverland S, et al.

This supplementary material has been provided by the authors to give readers additional information about their work.

#### eMethods

- Part I:** The measure of household income.
- Part II:** Methods used in comparisons between Norway and the US.
- Part III:** Sensitivity analyses of life expectancy estimates to alternative income specifications.

#### eResults

- eTable 1:** Disease groups and their ICD10 codes.
- eTable 2:** Life expectancy at the age of 40 by household income percentile.
- eTable 3:** Difference in life expectancy (in years) between the top and bottom income quartiles of income by age in the years 2005-2015.
- eFigure 1:** Sensitivity analysis of expected age at death, for the populations with and without no “pensionable income”, 2001-2014.
- eFigure 2:** Sensitivity analysis of life expectancy at age 40 years (presented as expected age at death) by the measure of income for individuals aged 63 years or older.
- eFigure 3:** Sensitivity analysis of life expectancy at age 40 years (presented as expected age at death) by the number of lags of income.
- eFigure 4:** Life expectancy at birth, by income percentile for the Norwegian population 2011-2015 excluding those with immigrant background, including those with immigrant background, and for the subpopulation defined according to Chetty et al. used in comparisons with US estimates.
- eFigure 5:** Survival curves for men in the 5th and 95th income percentiles in the Norwegian subpopulation 2001-2014, similar to the study sample defined by Chetty et al.
- eFigure 6:** Median income in constant NOK after tax for all households (left) and measures of income dispersion (right) in Norway, 2005-2015.
- eFigure 7:** Age-standardized annual mortality rates (deaths per 100 000 person years) for selected causes of death by income quartiles (Q1 to Q4), 2005-2015, for men and women.

## 36 eMethods

### 37 **Part I: The measure of household income**

38 The income measure included wage income, self-employment income, capital income, pension income and  
39 social benefits. To reflect the standard of living for each household member as accurately as possible, the  
40 following adjustments was made: First, income after tax was adjusted to the value of Norwegian Kroner (NOK)  
41 in 2015, using the consumer price index. Second, the square root equivalence scale<sup>1</sup> was used to account for the  
42 growing needs of a household with each additional member. Third, current income in year of death (year  $t$ ) was  
43 excluded, as individuals who die in year  $t$  do not earn full income that year. Fourth, income was aggregated  
44 across five years. The primary reason for using this aggregated measure of income, and not income in a single  
45 year, was that total income may vary substantially from year to year due to adaptation to tax reforms. There has  
46 been two tax reforms in the time span we are studying.<sup>2,3</sup> Hence, when plotting time trends, the consequences of  
47 these reforms would result in spikes in trends due to tax avoidance behavior, had we not aggregated income over  
48 several years.

49  
50 Equivalized household income for a person in a given year  $t$  was estimated by aggregating individual income for  
51 five successive years ( $t-5, \dots, t-1$ ), prior to year  $t$ ; counting number of household members in the year  $t$ ;  
52 aggregating individual income for each household member, and finally dividing by the square root of number of  
53 household members:  
54

$$Equivalised\ household\ income = \frac{\frac{1}{5} \sum_{i=5}^1 household\ income_{t-i}}{\sqrt{household\ members_t}}$$

55  
56 Preliminary estimations suggested that the lowest 3% income percentiles consisted of a mixed group of people  
57 with frequently zero or negative income. These were excluded. The remaining individuals were assigned  
58 percentile ranks from 1 to 100 based on “equivalized household income” relative to all other individuals of the  
59 same sex and age each calendar year. Income was for some analyses dichotomized into above and below median,  
60 or categorized into quartiles.  
61  
62

### 63 **Part II: Methods used in comparisons between Norway and the US**

64 To ensure that any difference in life expectancy, by income percentile, were not due to differences in the  
65 compositions of the subpopulations between Norway and the US or the methods used, a number of measures  
66 were taken. Below, the steps taken to ensure a comparable subpopulation for use in the US and Norway  
67 comparison, and how we have replicated the method used by Chetty et al.<sup>4</sup> is explained.  
68

#### 69 *The population for US Norway comparison*

70 The subpopulation was generated to match the US subpopulation by Chetty et al.<sup>4</sup> First, as the US estimates  
71 were based on the years 2001-2014, this study included data for the same years. The official household identifier  
72 was available from 2005. To generate a household identifier prior to 2005, information about marital status,  
73 partner identification and mother and father identification was used.  
74

75 There was no information about immigration status in the US dataset. Hence, all residents both with and without  
76 immigrant background was included in the Norwegian subpopulation in the US comparison analyses.  
77

78 The income variable used by Chetty et al.<sup>4</sup> was based on adjusted gross income plus tax-exempt interest income  
79 minus taxable Social Security and disability benefits, for those who filed tax returns. For those who did not file a  
80 tax return, household earnings were defined as the sum of all wage earnings and unemployment benefits. Chetty  
81 et al.<sup>4</sup> restricted their analysis to residents who had positive earnings. Eight percent of their subpopulation had  
82 zero income and 1% had negative income. To ensure that comparable segment was excluded from the  
83 Norwegian population, the study excluded those who had a “pensionable income” equal to zero, two years  
84 earlier. Pensionable income was the sum of personal income from wages, personal income from self-  
85 employment and unemployment benefits. Therefore, individuals with income consisting solely of e.g. disability  
86 benefits and disability insurance two years earlier, were excluded. Seven percent of the Norwegian population  
87 lived in households without pensionable income. When Chetty et al.<sup>4</sup> excluded the 8% with zero income in their  
88 data, this group accounted for 32% of deaths in the US. In addition to the 7% with zero pensionable income, we  
89 also excluded the 2% with the lowest income. In total, 9% of the total Norwegian population was excluded,  
90 which is identical to the percentage excluded from the US population used by Chetty et al.<sup>4</sup>. Thirty one percent  
91 of deaths in Norway in the age group 40-63 were in the excluded 9%, which is very similar to 32% in the US  
92 subpopulation.<sup>4</sup> We believe our exclusions based on 0 pensionable income, plus the additional 2% with lowest

93 income, is a good approximation of exclusions made by Chetty et al., with a comparable proportion of the  
94 population excluded and with equivalent mortality rates. Chetty et al. do not adjust the income measure for  
95 family size, hence a measure of household income, not adjusted for family size was used for this part of the  
96 analysis.

97  
98 Finally, Chetty et al. measured income for individuals aged 63 years or older at 61 years of age. Because 1999  
99 was the earliest year in which income was observed in the US dataset and the mortality data end in 2014,  
100 mortality rates were calculated up to 76 years of age. To ensure comparability, the same cohorts as Chetty et al.<sup>4</sup>  
101 was included in the Norwegian subpopulation.

#### 102 *Methods for US and Norway comparisons*

103 Chetty et al.<sup>4</sup> methods was replicated by estimating period life expectancy conditional on income percentile in  
104 four steps (eFigure 5):

105  
106  
107 (1) For individuals aged 62 years or younger, mortality rates were calculated based on income percentile 1-5  
108 years earlier.

109  
110 (2) Chetty et al.<sup>4</sup> state that the US rate of retirement increases sharply at 62 years of age. This is similar in  
111 Norway, where 62 years is the minimum retirement age for many public and private pension schemes. Income  
112 for individuals 63 years and older was measured for the same years as for 63-year-olds; i.e. when the individual  
113 was 58-62 years old. This study followed Chetty et al.<sup>4</sup> and calculated mortality rates up to 76 years of age.

114  
115 (3) Mortality rates for ages 77-90 were extrapolated using a Gompertz function estimate based on mortality  
116 between age 40 and 76. In a Gompertz model, the logarithm of the mortality rate is linear in age:  $\log(m(\text{age})) = \alpha$   
117  $+ \beta \text{age}$ . To estimate the Gompertz parameters, number of deaths was regressed on age using a generalized linear  
118 model (GLM) with a binomial probability distribution, with person years as the binomial denominator, and a log  
119 link function in the age group 40-76, by sex and income. Using the Gompertz parameters  $\alpha$  and  $\beta$  from this  
120 model, mortality rates as estimated at each age 77-90 for each sex and income percentile.

121  
122 (4) Sex-specific, but income-independent, mortality rates was used for in all survivors beyond the age of 90,  
123 based on official life tables published by Statistics Norway, according to method applied by Chetty et al.<sup>4</sup> This  
124 was done because Gompertz parameters fits less well after the age of 90.

125  
126 eFigure 1 shows expected age at death before and after excluding individuals with zero “pensionable income”  
127 from the subpopulation. The population living in households with zero “pensionable income” was a high  
128 mortality population. Therefore the curve shifted upwards.

129  
130 eFigure 4 shows the results from: 1) the main estimations subpopulation, 2011-2015, based on the methods for  
131 estimating life expectancy described in the manuscript; 2) the full Norwegian population, 2011-2015, including  
132 those with immigrant background based on the methods for estimating life expectancy described in the  
133 manuscript; and, 3) the subpopulation used for the US-Norway comparison, based on the methods developed by  
134 Chetty et al.<sup>4</sup> The three different methods and subpopulations resulted in differences in both the level of life  
135 expectancy by income and the shape of the association (eFigure 4).

### 136 **Part III: Sensitivity analyses of life expectancy estimates to alternative income specifications**

137  
138 Our baseline estimates of life expectancy by income were estimated by (1) calculating mortality rates for the  
139 ages of 40 to 95 years; (2) for those older than 95 years, mortality was assumed constant and set equal to the  
140 crude rate for this age group. Mortality rates were calculated based on income percentile 1-5 years earlier.  
141 Below, the sensitivity of the results to alternative specifications are assessed.

#### 142 *Sensitivity analysis of life expectancy at 40 years of age (e40) by the measure of income for individuals aged 63* 143 *years or older*

144  
145 When assigning individuals to percentile ranks by income after the age of 62, this study assumed that income  
146 after the age of 62 was a reasonable proxy for income prior to the age of 62. An important concern is that  
147 retirement might lead to a change in income class. As retirement rates increase at age 62, it may lead to structural  
148 changes in the composition of the percentiles; an individual in the 5<sup>th</sup> income percentile age 60, may not be in the  
149 5<sup>th</sup> percentile based on income at age 70.

150  
151 This assumption was explored by using income at age 58-62 for individuals aged 63 or older. In order to  
152 generate this income measure for the individuals aged 63 and above, income for all individuals in the

153 subpopulation when they were aged 58-62 was needed. This meant that a longer time series with income data  
154 was required. For example, to obtain income at age 58-62 for a 95 year old in 2011, information about that  
155 persons income from 1973-1977 was needed. The dataset was merged with a different income register that  
156 contained "assessed income", available from 1967. Assessed income ("alminnelig inntekt" in Norwegian) is a  
157 more crude measure of total income than our main source available from 1993 onwards. In particular, as  
158 assessed income forms the basis for taxation, several deductions have been subtracted from individuals' tax  
159 filings before the numbers are registered to the tax authorities' computer files, causing variable truncation over  
160 time.

161  
162 Furthermore, a household identifier was needed, but official household identifier from Statistics Norway was not  
163 available prior to 2005. To identify household members prior to 2005 for those who were 63 years and older,  
164 spouse identifiers and marital status was used. Hence, in the analyses, a household consisted of a maximum of  
165 two persons, for those aged 63 or older.

166  
167 To estimate life expectancy, all individuals aged 40 and above was included. Period life expectancy was  
168 estimated conditional on income percentiles by (1) calculating mortality rates for the ages of 40 to 62 years; for  
169 individuals aged 62 years or younger, mortality rates were calculated based on income percentile 1-5 years  
170 earlier using the household identifier available from 2005. (2) For individuals aged 63 or older, mortality rates  
171 based on general income at the ages 58-62 was calculated.

172  
173 eFigure 2 shows life expectancy at 40 years of age (e40) by the measure of income for individuals aged 63 years  
174 or older. The results were very similar: the relationship between e40 and income was essentially invariant to how  
175 income was measured.

176  
177 *Sensitivity analysis of life expectancy at age 40 by the number of lags of income*

178 This study used the mean income across five years lag to measure income. The primary reason for using this  
179 measure of income, and not income in a single year, was that total income may vary substantially from year to  
180 year due to adaptation to tax reforms. This would have consequences when plotting time trends. The 1-5 years of  
181 lag is different from the definition that Chetty et al.<sup>4</sup> used, which was income in a single year with two years lag.  
182 In eFigure 3 compare the Norwegian results on life expectancy by income when income was from a single year  
183 with two years lag. The two series are very similar, which supports Chetty et al.<sup>4</sup> finding that mortality rates by  
184 income are essentially invariant to the number of lags with which income is measured.

185  
186  
187  
188

189 **eResults**

190 **eTable 1: Grouping of diseases and their ICD10 codes.**

| <b>Cause of death</b>                                      | <b>ICD 10 codes</b>                                             |
|------------------------------------------------------------|-----------------------------------------------------------------|
| Infectious diseases                                        | A00-B99                                                         |
| Malignant neoplasms (excl. lung cancer)                    | C00-C32; C37-C99                                                |
| Lung cancer                                                | C33-C34                                                         |
| Diabetes                                                   | E10-E14                                                         |
| Nervous system diseases                                    | G00-G99                                                         |
| Substance use disorders                                    | F10; F11-F16, F18-F19;<br>X40-X49                               |
| Cardiovascular disease                                     | I00-I99                                                         |
| Diseases of the respiratory system (including COPD)        | J00-J99                                                         |
| External causes (Injuries excl. suicide and substance use) | V00-V99; W00-W99; X00-X39; X45-X59; X85-X99; Y00-Y86; Y87.1-Y99 |
| Suicide                                                    | X60-X84, Y87.0                                                  |
| Ill-defined conditions                                     | R00-R99                                                         |
| All other diseases                                         | Remaining codes                                                 |

191

192

193

**eTable 2: Life expectancy at the age of 40 by household income percentile.**

| Income percentile | Men                              |                |                                  |                |                                               |  |
|-------------------|----------------------------------|----------------|----------------------------------|----------------|-----------------------------------------------|--|
|                   | Excluding immigrants (2011-2015) |                | Including Immigrants (2011-2015) |                | Subpop comparable to Chetty et al (2001-2014) |  |
|                   | Person years                     |                | Person years=                    |                | Person years                                  |  |
|                   | =5 035 910                       |                | 5 859 823                        |                | = 11 202 681                                  |  |
|                   | e40                              | (95 % CI)      | e40                              | (95 % CI)      | e40                                           |  |
| 1                 | 30.59                            | (29.55 -31.64) | 34.46                            | (33.53 -35.40) | 36.30                                         |  |
| 2                 | 31.06                            | (29.98 -32.13) | 33.27                            | (32.25 -34.29) | 36.28                                         |  |
| 3                 | 32.17                            | (31.10 -33.23) | 33.37                            | (32.39 -34.36) | 37.05                                         |  |
| 4                 | 32.47                            | (31.40 -33.54) | 33.41                            | (32.40 -34.41) | 38.01                                         |  |
| 5                 | 33.27                            | (32.14 -34.40) | 33.26                            | (32.23 -34.29) | 38.92                                         |  |
| 6                 | 34.56                            | (33.51 -35.61) | 33.84                            | (32.81 -34.87) | 38.71                                         |  |
| 7                 | 35.55                            | (34.54 -36.56) | 33.96                            | (32.95 -34.96) | 39.00                                         |  |
| 8                 | 36.29                            | (35.28 -37.30) | 35.56                            | (34.55 -36.57) | 39.19                                         |  |
| 9                 | 36.87                            | (35.89 -37.86) | 35.83                            | (34.86 -36.80) | 39.32                                         |  |
| 10                | 37.12                            | (36.13 -38.12) | 36.07                            | (35.08 -37.06) | 39.62                                         |  |
| Omit 11-45        |                                  |                |                                  |                |                                               |  |
| 46                | 42.52                            | (41.48 -43.55) | 41.94                            | (41.00 -42.87) | 42.22                                         |  |
| 47                | 41.75                            | (40.84 -42.65) | 42.39                            | (41.51 -43.27) | 42.54                                         |  |
| 48                | 41.31                            | (40.35 -42.28) | 41.9                             | (40.94 -42.85) | 42.57                                         |  |
| 49                | 42.47                            | (41.42 -43.52) | 41.86                            | (40.73 -42.98) | 43.53                                         |  |
| 50                | 42.02                            | (40.98 -43.06) | 41.99                            | (41.02 -42.95) | 43.45                                         |  |
| 51                | 42.51                            | (41.51 -43.52) | 42                               | (41.04 -42.97) | 42.89                                         |  |
| 52                | 42.34                            | (41.39 -43.30) | 42.35                            | (41.41 -43.29) | 42.99                                         |  |
| 53                | 42.11                            | (41.16 -43.06) | 42.05                            | (41.12 -42.97) | 43.33                                         |  |
| 54                | 42.23                            | (41.32 -43.14) | 42.08                            | (41.21 -42.95) | 43.05                                         |  |
| 55                | 42.44                            | (41.49 -43.39) | 42.41                            | (41.49 -43.32) | 43.21                                         |  |
| Omit 46-90        |                                  |                |                                  |                |                                               |  |
| 91                | 44.38                            | (43.38 -45.38) | 44.52                            | (43.57 -45.48) | 46.63                                         |  |
| 92                | 44.24                            | (43.28 -45.20) | 44.18                            | (43.22 -45.13) | 46.67                                         |  |
| 93                | 45.06                            | (43.99 -46.13) | 44.88                            | (43.90 -45.87) | 45.91                                         |  |
| 94                | 44.83                            | (43.90 -45.76) | 44.92                            | (43.97 -45.86) | 46.16                                         |  |
| 95                | 44.03                            | (43.01 -45.05) | 43.99                            | (43.06 -44.93) | 45.57                                         |  |
| 96                | 45.07                            | (44.09 -46.05) | 45.19                            | (44.18 -46.19) | 46.46                                         |  |
| 97                | 44.82                            | (43.82 -45.81) | 44.75                            | (43.80 -45.70) | 46.61                                         |  |
| 98                | 44.74                            | (43.90 -45.59) | 44.63                            | (43.78 -45.48) | 46.69                                         |  |
| 99                | 45.18                            | (44.26 -46.10) | 45.41                            | (44.54 -46.28) | 47.44                                         |  |
| 100               | 44.38                            | (43.38 -45.38) | 44.49                            | (43.48 -45.50) | 46.90                                         |  |

195  
196  
197  
198

| Income percentile | Women                    |                          |                                    |
|-------------------|--------------------------|--------------------------|------------------------------------|
|                   | Excluding immigrants     | Including immigrants     | Subpop comparable to Chetty et al. |
|                   | (2011-2015)              | (2011-2015)              | (2001-2014)                        |
|                   | Person years = 5 343 298 | Person years = 6 078 398 | Person years = 10 810 063          |
|                   | e40 (95 % CI)            | e40 (95 % CI)            | e40                                |
| 1                 | 37.98(37.06-38.90)       | 39.48(38.62-40.33)       | 41.48                              |
| 2                 | 37.48(36.53-38.43)       | 39.10(38.25-39.94)       | 43.27                              |
| 3                 | 38.52(37.60-39.44)       | 38.67(37.77-39.56)       | 43.45                              |
| 4                 | 39.08(38.14-40.03)       | 39.28(38.41-40.16)       | 43.21                              |
| 5                 | 38.81(37.85-39.76)       | 39.32(38.42-40.22)       | 44.20                              |
| 6                 | 39.69(38.74-40.63)       | 39.62(38.73-40.52)       | 44.00                              |
| 7                 | 39.81(38.86-40.77)       | 39.84(38.92-40.76)       | 44.80                              |
| 8                 | 41.49(40.62-42.36)       | 40.33(39.45-41.21)       | 44.55                              |
| 9                 | 40.99(40.07-41.92)       | 40.76(39.88-41.64)       | 45.48                              |
| 10                | 41.54(40.66-42.42)       | 40.67(39.80-41.55)       | 44.93                              |
| Omit 11-45        |                          |                          |                                    |
| 46                | 45.10(44.30-45.90)       | 45.25(44.49-46.02)       | 47.22                              |
| 47                | 45.38(44.55-46.21)       | 45.24(44.45-46.02)       | 48.23                              |
| 48                | 44.80(43.99-45.62)       | 45.16(44.36-45.95)       | 47.75                              |
| 49                | 45.17(44.39-45.95)       | 44.90(44.13-45.66)       | 47.21                              |
| 50                | 44.62(43.83-45.42)       | 44.81(44.06-45.56)       | 46.89                              |
| 51                | 44.82(44.01-45.63)       | 45.51(44.76-46.26)       | 47.21                              |
| 52                | 45.92(45.14-46.71)       | 45.68(44.91-46.45)       | 47.78                              |
| 53                | 45.63(44.82-46.44)       | 45.35(44.54-46.17)       | 48.11                              |
| 54                | 45.48(44.70-46.26)       | 45.85(45.12-46.58)       | 47.55                              |
| 55                | 45.63(44.81-46.45)       | 45.33(44.51-46.14)       | 47.08                              |
| Omit 46-90        |                          |                          |                                    |
| 91                | 46.97(46.20-47.74)       | 47.27(46.53-48.01)       | 49.06                              |
| 92                | 47.08(46.33-47.84)       | 47.40(46.66-48.13)       | 49.40                              |
| 93                | 47.12(46.32-47.91)       | 47.22(46.46-47.99)       | 48.73                              |
| 94                | 47.24(46.46-48.03)       | 46.96(46.18-47.75)       | 50.12                              |
| 95                | 47.62(46.88-48.37)       | 47.99(47.29-48.70)       | 50.21                              |
| 96                | 47.73(47.02-48.45)       | 47.69(46.99-48.40)       | 49.96                              |
| 97                | 47.59(46.83-48.35)       | 47.30(46.56-48.03)       | 49.30                              |
| 98                | 46.81(46.02-47.59)       | 47.08(46.31-47.84)       | 49.58                              |
| 99                | 47.17(46.37-47.96)       | 47.19(46.43-47.95)       | 48.96                              |
| 100               | 46.40(45.66-47.13)       | 46.58(45.88-47.28)       | 49.26                              |

200  
201  
202



203  
204

**eTable 3: Difference in life expectancy (in years) between the top and bottom income quartiles of income by age in the years 2005-2015.**

| <b>Men</b>   | <b>2005</b> | <b>2006</b> | <b>2007</b> | <b>2008</b> | <b>2009</b> | <b>2010</b> | <b>2011</b> | <b>2012</b> | <b>2013</b> | <b>2014</b> | <b>2015</b> |
|--------------|-------------|-------------|-------------|-------------|-------------|-------------|-------------|-------------|-------------|-------------|-------------|
| Age group    |             |             |             |             |             |             |             |             |             |             |             |
| 40           | 0.5         | 0.4         | 0.3         | 0.4         | 0.5         | 0.3         | 0.5         | 0.4         | 0.4         | 0.4         | 0.5         |
| 45           | 0.6         | 0.6         | 0.7         | 0.5         | 0.6         | 0.5         | 0.6         | 0.5         | 0.5         | 0.5         | 0.6         |
| 50           | 0.8         | 0.8         | 0.7         | 0.9         | 1.0         | 0.9         | 0.8         | 1.0         | 0.9         | 0.8         | 0.8         |
| 55           | 0.9         | 1.1         | 1.1         | 1.0         | 1.0         | 1.2         | 1.1         | 1.1         | 1.2         | 1.0         | 1.0         |
| 60           | 1.1         | 1.1         | 1.1         | 1.1         | 1.2         | 1.3         | 1.2         | 1.3         | 1.1         | 1.3         | 1.2         |
| 65           | 1.1         | 1.1         | 1.1         | 1.1         | 1.1         | 1.2         | 1.2         | 1.1         | 1.2         | 1.3         | 1.4         |
| 70           | 0.7         | 0.6         | 1.0         | 0.9         | 0.9         | 1.0         | 0.9         | 1.0         | 1.1         | 1.1         | 1.1         |
| 75           | 0.4         | 0.5         | 0.6         | 0.5         | 0.6         | 0.9         | 0.8         | 0.8         | 0.8         | 0.8         | 0.7         |
| 80           | 0.2         | 0.3         | 0.3         | 0.4         | 0.4         | 0.4         | 0.5         | 0.5         | 0.5         | 0.6         | 0.6         |
| 85           | 0.0         | 0.0         | 0.1         | 0.1         | 0.2         | 0.1         | 0.2         | 0.2         | 0.2         | 0.3         | 0.2         |
| 90+          | -0.1        | 0.0         | 0.0         | 0.1         | 0.0         | 0.1         | 0.1         | 0.1         | 0.1         | 0.1         | 0.1         |
| <b>Total</b> | <b>6.2</b>  | <b>6.5</b>  | <b>7.0</b>  | <b>7.1</b>  | <b>7.5</b>  | <b>7.7</b>  | <b>7.9</b>  | <b>7.9</b>  | <b>7.9</b>  | <b>8.2</b>  | <b>8.3</b>  |
|              |             |             |             |             |             |             |             |             |             |             |             |
| <b>Women</b> | <b>2005</b> | <b>2006</b> | <b>2007</b> | <b>2008</b> | <b>2009</b> | <b>2010</b> | <b>2011</b> | <b>2012</b> | <b>2013</b> | <b>2014</b> | <b>2015</b> |
| Age group    |             |             |             |             |             |             |             |             |             |             |             |
| 40           | 0.1         | 0.2         | 0.1         | 0.2         | 0.2         | 0.2         | 0.2         | 0.1         | 0.2         | 0.2         | 0.2         |
| 45           | 0.3         | 0.4         | 0.3         | 0.3         | 0.4         | 0.3         | 0.4         | 0.2         | 0.3         | 0.4         | 0.3         |
| 50           | 0.3         | 0.5         | 0.6         | 0.5         | 0.5         | 0.5         | 0.5         | 0.5         | 0.5         | 0.6         | 0.4         |
| 55           | 0.6         | 0.4         | 0.6         | 0.7         | 0.6         | 0.5         | 0.7         | 0.6         | 0.7         | 0.7         | 0.6         |
| 60           | 0.6         | 0.7         | 0.6         | 0.7         | 0.6         | 0.8         | 0.8         | 0.8         | 0.9         | 0.8         | 0.9         |
| 65           | 0.6         | 0.7         | 0.6         | 0.6         | 0.7         | 0.8         | 0.9         | 0.9         | 0.9         | 0.9         | 0.9         |
| 70           | 0.4         | 0.6         | 0.7         | 0.7         | 0.8         | 0.8         | 0.8         | 0.9         | 0.8         | 0.9         | 0.9         |
| 75           | 0.2         | 0.3         | 0.4         | 0.5         | 0.6         | 0.7         | 0.7         | 0.7         | 0.7         | 0.9         | 1.0         |
| 80           | -0.1        | 0.1         | 0.1         | 0.2         | 0.3         | 0.5         | 0.4         | 0.5         | 0.6         | 0.8         | 0.5         |
| 85           | -0.2        | -0.1        | 0.1         | 0.1         | 0.2         | 0.3         | 0.1         | 0.3         | 0.2         | 0.4         | 0.3         |
| 90+          | -0.4        | -0.2        | 0.0         | 0.0         | 0.1         | 0.1         | 0.2         | 0.2         | 0.2         | 0.3         | 0.2         |
| <b>Total</b> | <b>2.5</b>  | <b>3.5</b>  | <b>4.1</b>  | <b>4.4</b>  | <b>4.8</b>  | <b>5.4</b>  | <b>5.8</b>  | <b>5.8</b>  | <b>5.9</b>  | <b>6.9</b>  | <b>6.2</b>  |

205  
206  
207  
208  
209  
210

211 **eFigure 1: Sensitivity analysis of expected age at death, for the populations**  
212 **with and without no “pensionable income”, 2001-2014.**

213 **Left: men. Right: women.**

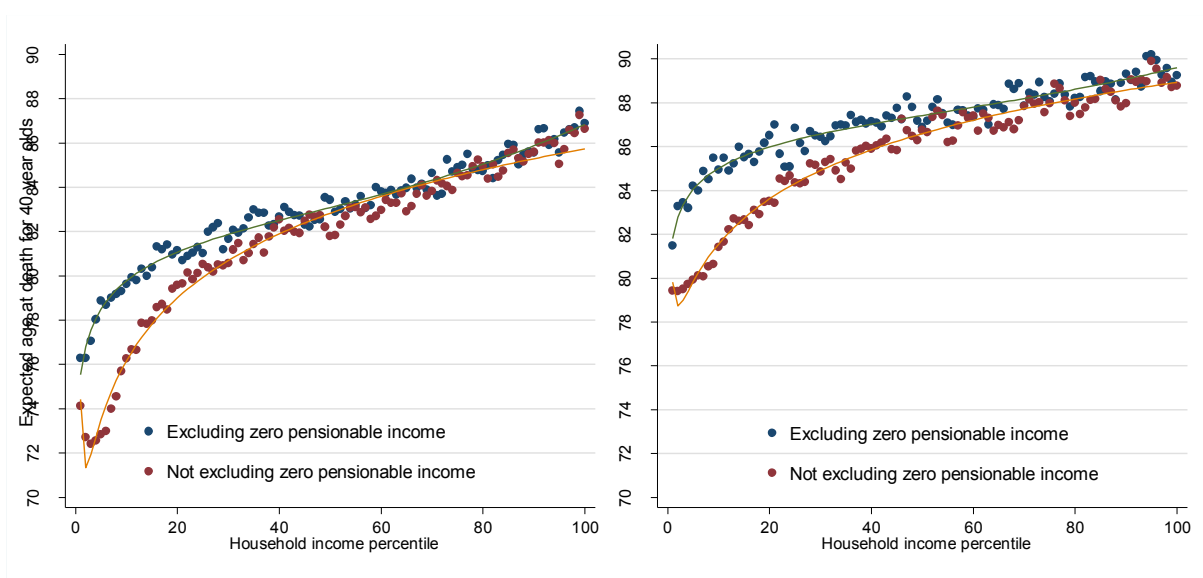

214

215 **eFigure 2: Sensitivity analysis of life expectancy by the measure of income for**  
216 **individuals aged 63 years or older.**

217 **Left: men. Right: women.**

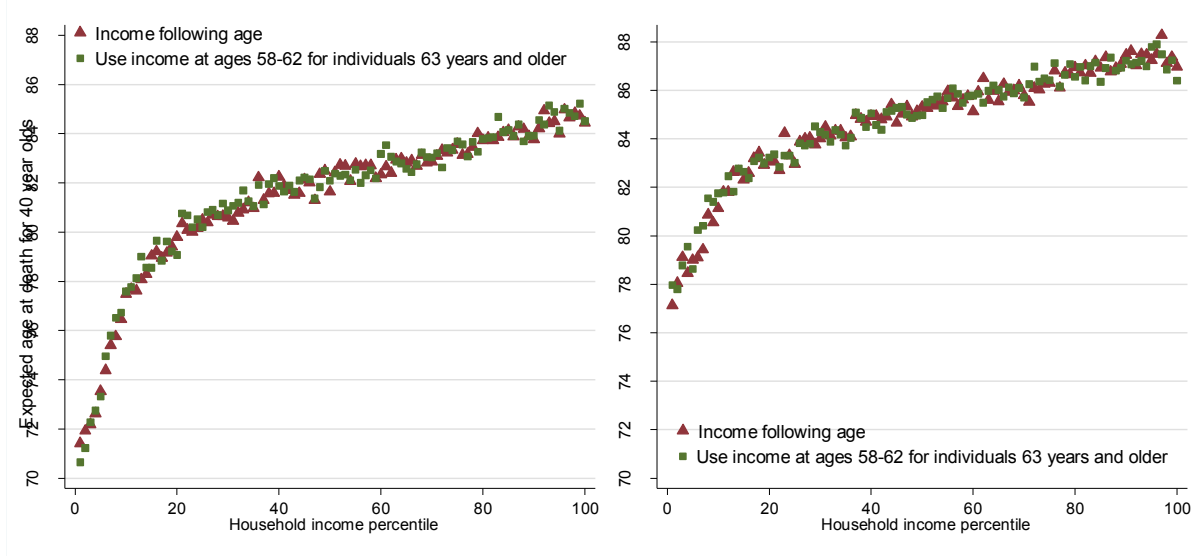

219

220

221 **eFigure 3: Sensitivity analysis of life expectancy by the number of lags of**  
 222 **income.**  
 223 **Left: men. Right: women.**

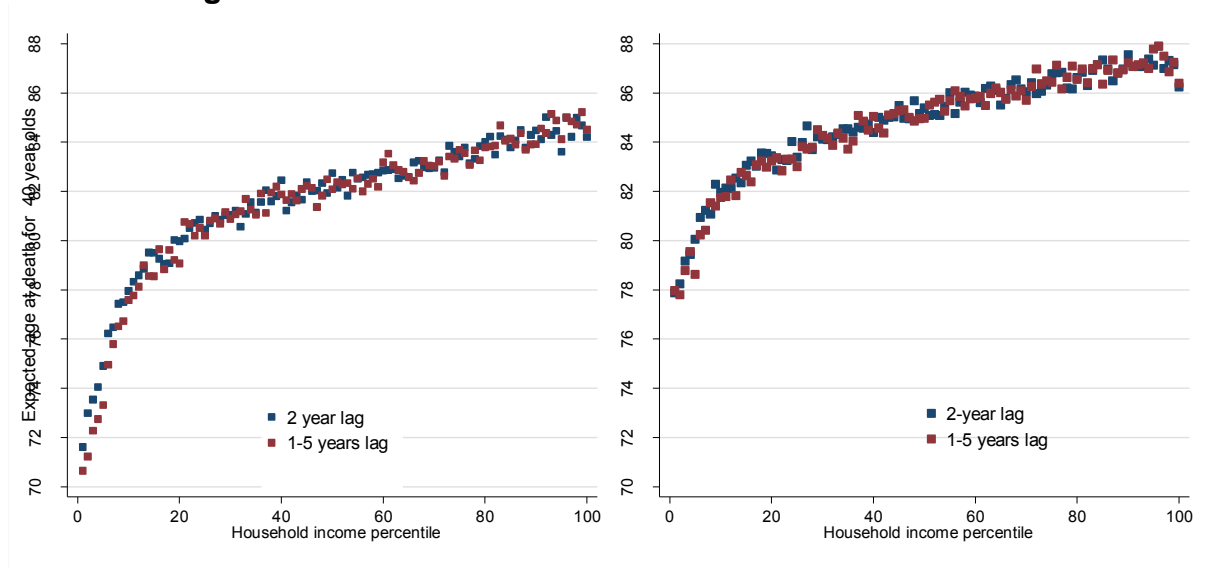

224  
 225  
 226  
 227  
 228  
 229  
 230  
 231

**eFigure 4: Life expectancy at birth, by income percentile for the Norwegian population 2011-2015 excluding those with immigrant background (blue), including those with immigrant background (red), and for the subpopulation defined according to Chetty et al. used in comparisons with US estimates (green). Left: men. Right: women.**

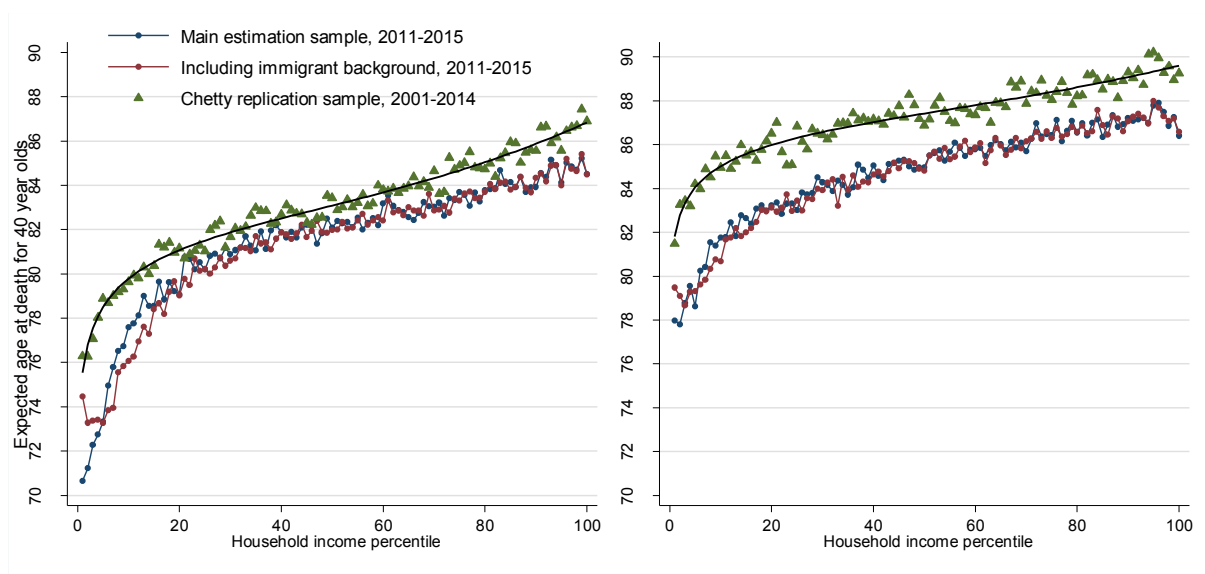

232  
 233  
 234  
 235  
 236  
 237

Life expectancy for the main estimation sample and sample including immigrants is based on actual mortality rates and presented as expected age at death.  
 Life expectancy for the Chetty replication sample is estimated by a combination of actual mortality rates (ages 40-76) and forecasted mortality rates (ages 77-90) and uniform sex specific mortality rates (ages 91 and above).

238 **eFigure 5: Survival curves for men in the 5th and 95th income percentiles in the**  
 239 **Norwegian subpopulation 2001-2014, similar to the study sample defined by**  
 240 **Chetty et al.**

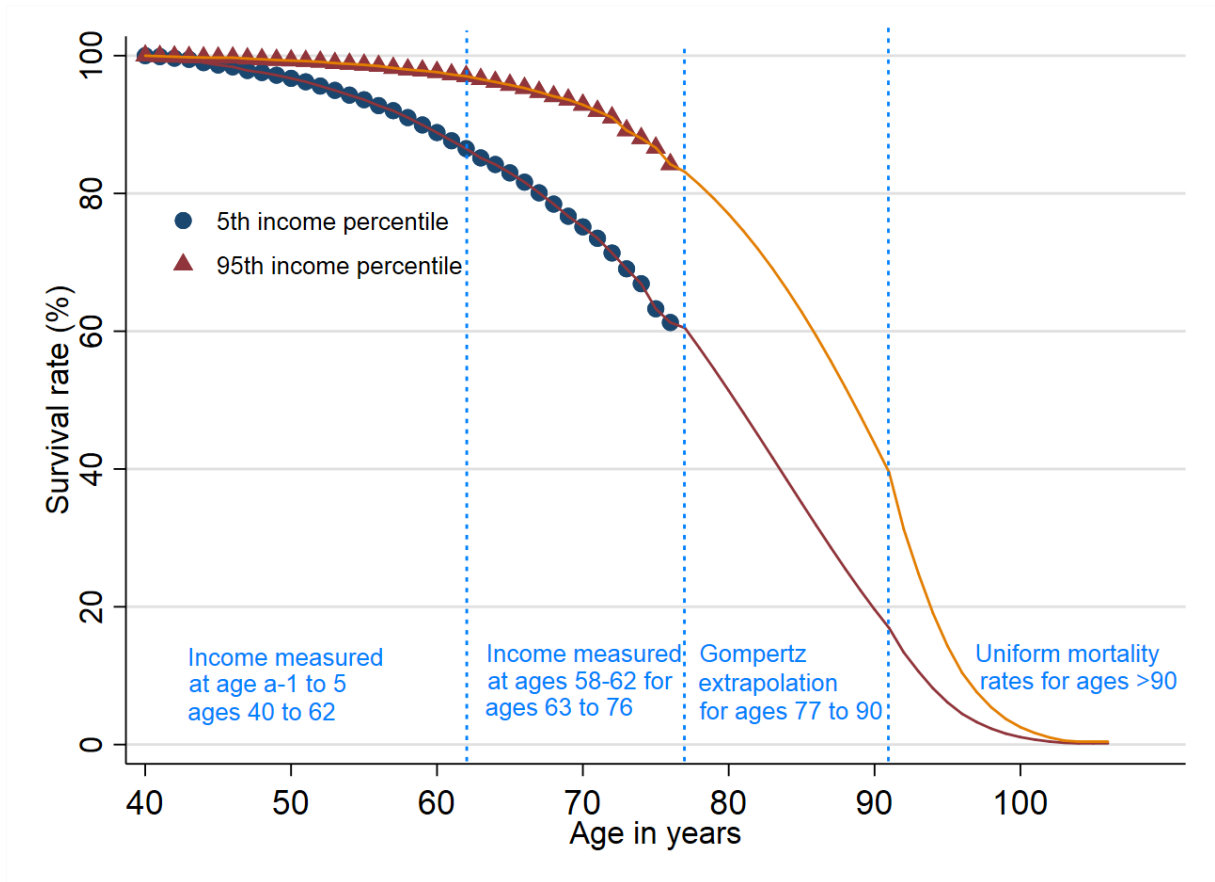

241 **eFigure 6: Median income in constant NOK after tax for all households (left)**  
 242 **and measures of income dispersion – the Gini coefficient and P10/P90 ratio**  
 243 **(right) in Norway, 2005-2015.**  
 244

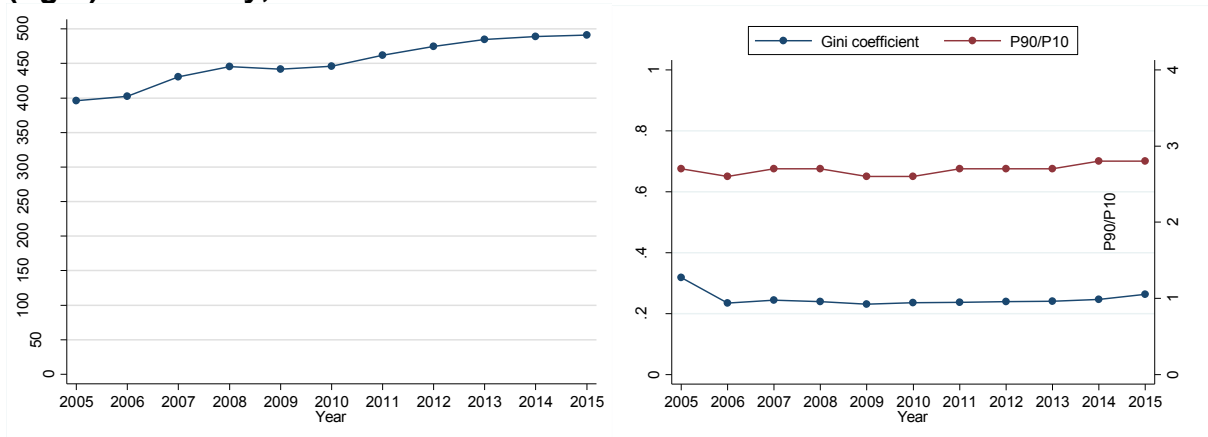

245 Source of data: Statistics Norway  
 246 The Gini coefficient is a number between 0 and 1 that measures the degree of inequality in the  
 247 distribution of income, where 0 corresponds with perfect equality and 1 corresponds with perfect  
 248 inequality.  
 249 P90/P10 is the percentile ratio of the 9th and the 1st decile cut-offs.  
 250  
 251  
 252

253 **eFigure 7. Age-standardized annual mortality rates (deaths per 100 000 person**  
 254 **years) for selected causes of death by income quartiles (Q1 to Q4), 2005-2015,**  
 255 **for men and women.**

256  
 257 **A: Men**

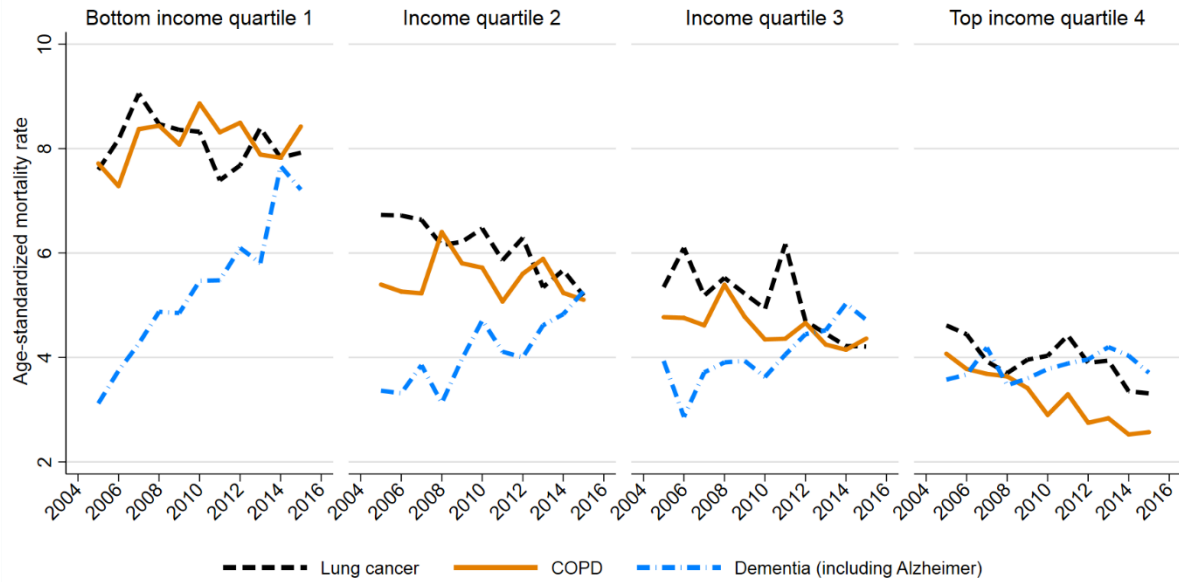

258  
 259 **B: Women**

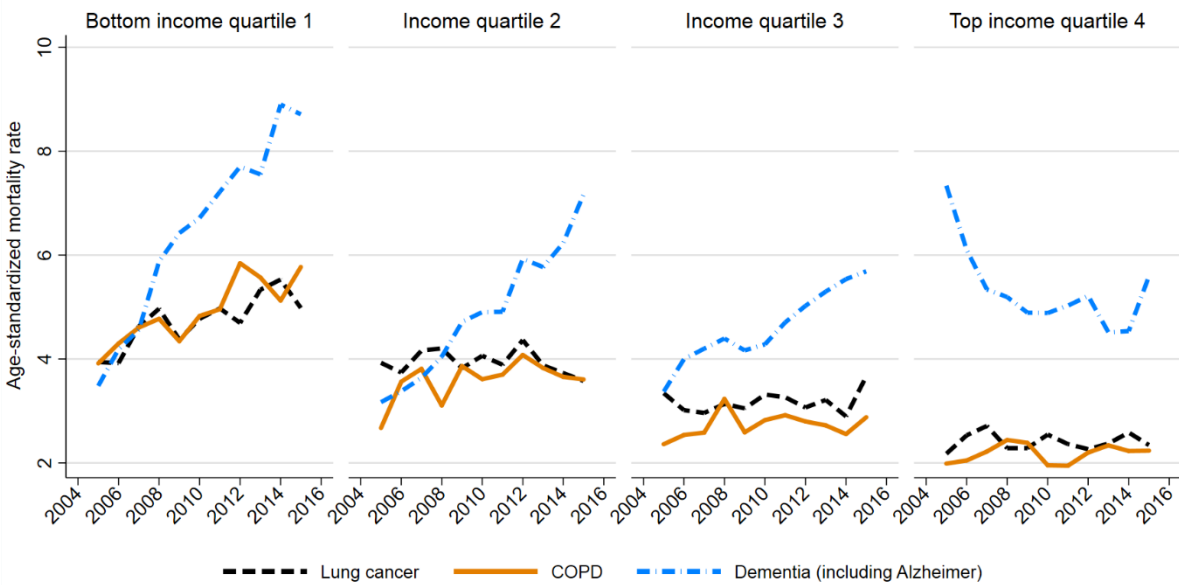

260 Direct age-adjustment. The age-specific death rates was weighted by the proportion of each group in  
 261 the mean population in Norway from 2005-2011. Estimates are based on the total Norwegian  
 262 population above the age of 40, excluding the lowest 3% income and those with immigrant  
 263 background.  
 264 Lung cancer, COPD and Dementia (including AD) was chosen ex-post, as these were the causes of  
 265 death with the most diverging time trends across income groups.  
 266  
 267

268 **References**

- 269 1. OECD. An overview of growing income inequalities in OECD countries: main findings. *Divided*  
270 *We Stand: Why Inequality Keeps Rising*, OECD publishing, Paris. 2011.
- 271 2. Thoresen TO, Bø EE, Fjærli E, Halvorsen E. A Suggestion for Evaluating the Redistributive  
272 Effects of Tax Changes: With an Application to the 2006 Norwegian Tax Reform. *Public*  
273 *Finance Review*. 2012;40(3):303-338.
- 274 3. Aaberge R, Atkinson A, Modalsli J. The ins and outs of top income mobility. *IZA Discussion*  
275 *Paper*. 2013; 7729.
- 276 4. Chetty R, Stepner M, Abraham S, et al. The association between income and life expectancy  
277 in the United States, 2001-2014. *Jama*. 2016;315(16):1750-1766.

278
